# Supplementary material for: Cell-specific microarray profiling experiments reveal a comprehensive picture of gene expression in the C. elegans nervous system
Source: PubMed Central journal article supplement (PMC2323220; doi:10.1186/gb-2007-8-7-r135), 2007-07-05
Supplement: gb-2007-8-7-r135-S17.pdf [file gb-2007-8-7-r135-S17.pdf]

| Cosmid Name            | Common Name   | Protein                       | GFP expression                                                                      |                                                                                   |                                                                                     |                                                                                       |                                                                                                       |                                                                          |
|------------------------|---------------|-------------------------------|-------------------------------------------------------------------------------------|-----------------------------------------------------------------------------------|-------------------------------------------------------------------------------------|---------------------------------------------------------------------------------------|-------------------------------------------------------------------------------------------------------|--------------------------------------------------------------------------|
|                        |               |                               | Pan-neural                                                                          |                                                                                   | A-class                                                                             |                                                                                       | Neurons                                                                                               | Other cells                                                              |
|                        |               |                               | Emb                                                                                 | Larval                                                                            | Emb                                                                                 | Larval                                                                                |                                                                                                       |                                                                          |
| C01G6.4                |               | Predicted E3 ubiquitin ligase | 1.8                                                                                 |  |    |    | All ventral cord motor neurons, head and tail neurons, touch neurons                                  | Intestine, vulval muscle, pharyngeal muscle, anal depressor, body muscle |
| VF11C1L.1              | <i>ppk-3</i>  | PIP kinase                    | 1.8                                                                                 |  |    |    | All ventral cord motor neurons, head and tail neurons, PLN                                            | Pharyngeal muscle, vulval muscle, anal depressor, hypodermis             |
| C25D7.8                |               | novel                         | 1.9                                                                                 |  | 2.9                                                                                 |    | Weak in head and tail neurons, ventral cord                                                           | Pharynx, sheath cells, distal tip cell                                   |
| F08G12.1               |               |                               | 3.0                                                                                 |  | 2.0                                                                                 |    | Bright in head neurons, few tail neurons. weak in all ventral cord motor neurons. Touch neurons, PDE. | Intestine, head muscle, pharyngeal muscle, hypodermis, distal tip cell   |
| M79.1                  | <i>abl-1</i>  | Abelson kinase                | 2.3                                                                                 |  | 2.4                                                                                 |    | All ventral cord motor neurons, head and tail neurons                                                 |                                                                          |
| Y71D11A.5              |               | Ligand-gated ion channel      | 2.1                                                                                 | 1.8                                                                               | 2.5                                                                                 |    | DA, DB, DD, VA, VB, VD, AS head and tail neurons                                                      | Body muscle, head muscle, pharyngeal muscle                              |
| F25G6.4                | <i>acr-15</i> | Acetylcholine receptor        |    | 4.9                                                                               |    |    | All VNC motor neuron classes, except DD, head and tail neurons                                        |                                                                          |
| T27A1.6 <sup>1</sup>   | <i>mab-9</i>  | Transcription factor          |    | 1.7                                                                               | 2.3                                                                                 |    | DA, DB, DD, VD, AS                                                                                    |                                                                          |
| F39G3.8 <sup>1</sup>   | <i>tig-2</i>  | TGF- $\beta$                  |   | 1.8                                                                               | 1.8                                                                                 |   | VA, VB, DA, DB, AS touch neurons                                                                      | Body muscle, pharyngeal neurons                                          |
| T19C4.5 <sup>1</sup>   |               | novel                         |  | 2.0                                                                               | 2.2                                                                                 |  |                                                                                                       |                                                                          |
| CC4.2 <sup>1,3</sup>   | <i>nlp-15</i> | neuropeptide                  |  | 6.5                                                                               | 2.6                                                                                 |  | DD, head and tail neurons                                                                             | Body muscle, pharyngeal muscle                                           |
| C18H9.7                | <i>rpy-1</i>  | rapsyn                        |  | 2.7                                                                               | 1.7                                                                                 |  | DA, VD, AS, VB, DB                                                                                    | Body muscle                                                              |
| C04E12.7               |               | Phospholipid scramblase       |  | 3.2                                                                               |  | 1.8                                                                                   | All ventral cord motor neurons, head and tail neurons, touch neurons                                  | Body muscle, anal depressor, sphincter muscle? Excretory gland cells?    |
| F36A2.4 <sup>1,4</sup> | <i>twk-30</i> | K <sup>+</sup> channel        |  | 2.1                                                                               | 3.5                                                                                 | 5.1                                                                                   | All ventral cord neurons                                                                              |                                                                          |
| Y71H9A.3               | <i>sto-4</i>  | stomatin                      |  | 3.0                                                                               |  | 1.6                                                                                   | Posterior ventral cord motor neurons (VA, VB, DB, AS), head and tail neurons, touch neurons           |                                                                          |

|                          |               |                            |  |  |  |  |                                                                                                              |                                          |
|--------------------------|---------------|----------------------------|--|--|--|--|--------------------------------------------------------------------------------------------------------------|------------------------------------------|
| F29G6.2 <sup>1</sup>     |               | novel                      |  |  |  |  | All neurons                                                                                                  |                                          |
| C44B11.3                 | <i>mec-12</i> | Alpha-tubulin              |  |  |  |  | L2 -- DA, VA, VB, VD, bright in touch neurons, head and tail neurons<br>L3 -- all ventral cord motor neurons |                                          |
| T23D8.2 <sup>1</sup>     | <i>tsp-7</i>  | tetraspanin                |  |  |  |  | All ventral cord neurons, head and tail neurons                                                              |                                          |
| T05C12.2 <sup>1</sup>    | <i>acr-14</i> | Acetylcholine receptor     |  |  |  |  | DA, VB, AS, DB, DD, HSN, VC4&5, AIY, head neurons                                                            | Muscle, intestine                        |
| F33D4.3 <sup>1,2</sup>   | <i>flp-13</i> | neuropeptide               |  |  |  |  | I5, ASE, ASG, BAG, DD, M3, M5, head neurons                                                                  |                                          |
| C11D2.6 <sup>1</sup>     | <i>nca-1</i>  | Ca <sup>++</sup> channel   |  |  |  |  | DA, DB, VA, VB, head and tail neurons                                                                        |                                          |
| E03D2.2 <sup>1,3</sup>   | <i>nlp-9</i>  | neuropeptide               |  |  |  |  | VA, head neurons                                                                                             | Intestine                                |
| F55C12.4 <sup>1</sup>    |               | novel                      |  |  |  |  | DA, VB, DB, VD, DD, bright in AS, also head and tail neurons                                                 |                                          |
| F43C9.4 <sup>1,5</sup>   | <i>mig-13</i> | CUB domain                 |  |  |  |  | Bright in anterior ventral cord neurons, weak and mosaic in posterior ventral cord.                          | Pharyngeal/intestinal valves, hypodermis |
| F39B2.8                  |               | Predicted membrane protein |  |  |  |  | DA, DB, VA, VB, DD, VD, head neurons                                                                         | Pharyngeal muscle                        |
| K02E10.8 <sup>1</sup>    | <i>syg-1</i>  | Ig domain                  |  |  |  |  | DA, DB, DD, VA, VB, VD, AS, head neurons                                                                     | Head muscle                              |
| ZC21.2 <sup>1</sup>      | <i>trp-1</i>  | Ca <sup>++</sup> channel   |  |  |  |  | DA, DB, VA, VB                                                                                               |                                          |
| Y47D3B.2a <sup>1,6</sup> | <i>nlp-21</i> | neuropeptide               |  |  |  |  | DA, DB, VA, VB, AS, head neurons                                                                             | Body muscle, intestine                   |
| F09C3.2                  |               | phosphatase                |  |  |  |  | DA, DB, VA, VB, VD                                                                                           | Intestine, hypodermis                    |
| T27E9.9                  |               | Ligand-gated ion channel   |  |  |  |  | DA, DB, VA, VB, VC, touch neurons, head and tail neurons                                                     |                                          |
| Y34D9B.1                 | <i>mig-1</i>  | Frizzled-like              |  |  |  |  | All ventral cord motor neurons, head neurons, touch neurons                                                  | Intestine, anal depressor, head muscle   |

black boxes = not detected, red boxes = enriched, yellow boxes = expressed gene (EG)

1. Fox, RM et al., 2005
2. Kim, K and Li, C, 2004

3. Li, C et al., 1999
4. Salkoff, L et al., 2001

5. Sym, M et al., 1999
6. Nathoo, AN et al., 2001
